# Supplementary material for: Pipetting-driven microfluidic immunohistochemistry to facilitate enhanced immunoreaction and effective use of antibodies
Source: Royal Society of Chemistry journal article supplement (doi:10.1039/c6lc01495j), 2017-01-01
Supplement: c6lc01495j1.pdf [file c6lc01495j1.pdf]

Electronic Supplementary Information (ESI)

**Pipetting-driven microfluidic immunohistochemistry to facilitate enhanced immunoreaction and effective use of antibodies**

Segi Kim<sup>a1</sup>, Seyong Kwon<sup>a1</sup>, Chang Hyun Cho<sup>a</sup> and Je-Kyun Park<sup>a,b\*</sup>

<sup>a</sup> *Department of Bio and Brain Engineering, Korea Advanced Institute of Science and Technology (KAIST), 291 Daehak-ro, Yuseong-gu, Daejeon 34141, Republic of Korea. E-mail: jekyun@kaist.ac.kr; Fax: +82 42 350 4310; Tel: +82 42 350 4315.*

<sup>b</sup> *KAIST Institute for Health Science and Technology, 291 Daehak-ro, Yuseong-gu, Daejeon 34141, Republic of Korea.*

<sup>1</sup> The first two authors contributed equally to this work.

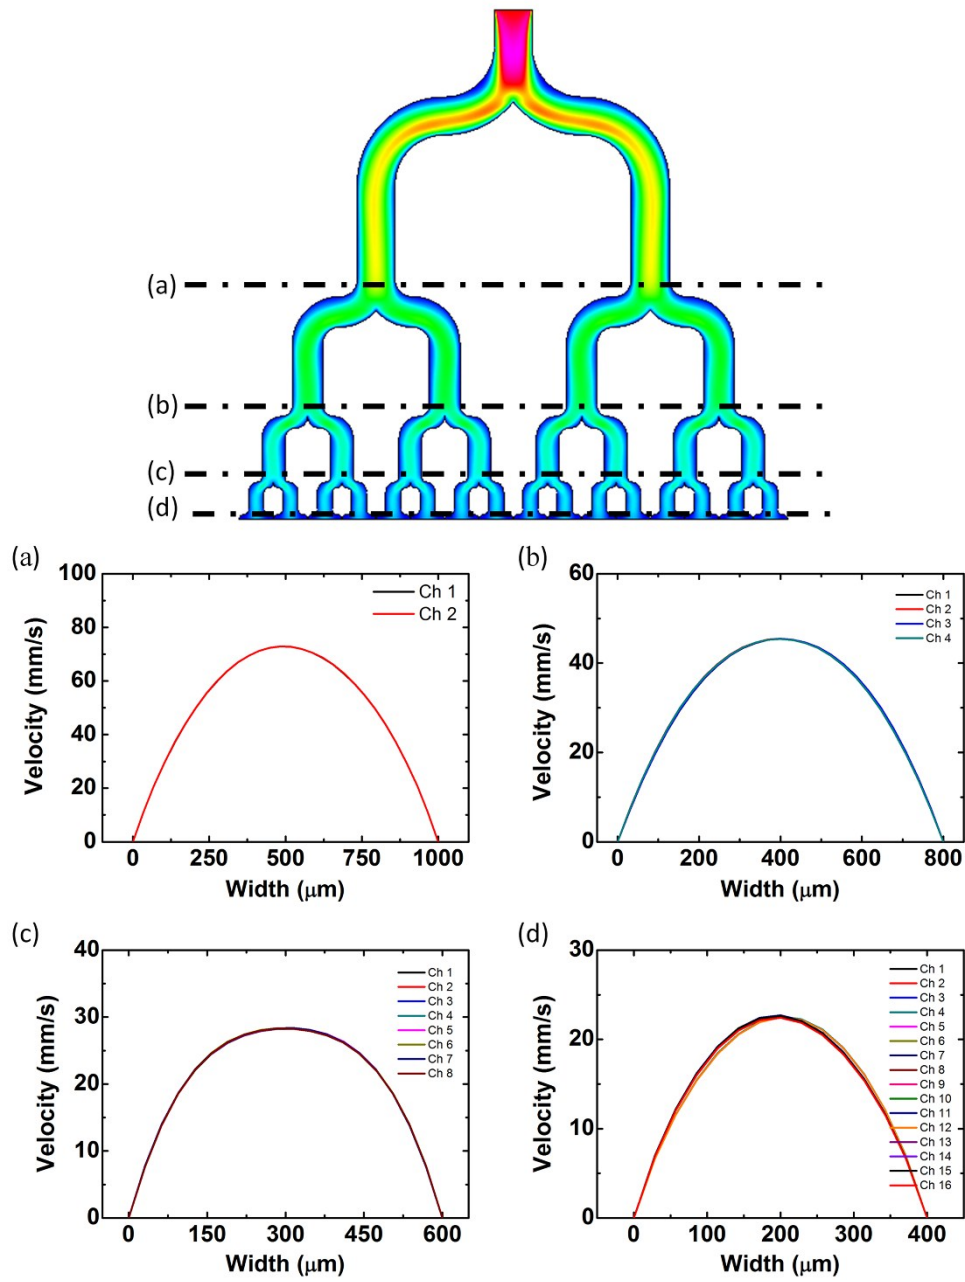

**Figure S1.** CFD simulation of velocity profile in the distribution channel. The velocity shows a parabolic profile at the end of each distribution channel from (a) to (d).
